# Supplementary material for: Lactic Acid-Based Natural Deep Eutectic Solvents to Extract Bioactives from Marine By-Products
Source: MDPI journal article supplement (doi:10.3390/molecules27144356), 2022-07-07
Supplement: s1 [file s1]

Supplementary Material

**Table S1.** Percent composition (mg/ 100 mg raw material) of lipids, proteins, and ash extracted from each raw materials using natural deep eutectic solvents Lactic acid:Fructose (Lac:Fru), Lactic acid:Urea (Lac:Ur), and raw materials characterization using conventional extraction methods\*.

|                     |          | Lac:Fru      | Lac:Ur       | Raw materials characterization |
|---------------------|----------|--------------|--------------|--------------------------------|
| Codfish bones       | Lipids   | 0.14 ± 0.03  | 0.18 ± 0.03  | 2.60 ± 0.95                    |
|                     | Proteins | 5.07 ± 0.02  | 6.70 ± 0.14  | 38.59 ± 4.17                   |
|                     | Ash      | 1.87 ± 0.04  | 2.63 ± 0.27  | 54.35 ± 0.24                   |
| Mussel meat         | Lipids   | 0.82 ± 0.15  | 1.08 ± 0.03  | 15.41 ± 2.09                   |
|                     | Proteins | 13.99 ± 0.43 | 18.21 ± 0.36 | 51.32 ± 2.78                   |
|                     | Ash      | 0.83 ± 0.25  | 1.17 ± 0.39  | 17.57 ± 0.50                   |
| Tuna vitreous humor | Lipids   | 0.52 ± 0.06  | 0.59 ± 0.14  | 8.06 ± 1.42                    |
|                     | Proteins | 5.16 ± 0.15  | 7.43 ± 0.25  | 14.31 ± 1.62                   |
|                     | Ash      | 3.94 ± 0.22  | 4.77 ± 0.33  | 62.26 ± 0.46                   |

\* according to the methods described in section 3.4.
